# Supplementary material for: Experimental and theoretical investigations of the effect of heteroatom-doped carbon microsphere supports on the stability and storage capacity of nano-Co3O4 conversion anodes for application in lithium-ion batteries
Source: Royal Society of Chemistry journal article supplement (doi:10.1039/d0na00261e), 2020-01-01
Supplement: d0na00261e1.pdf [file d0na00261e1.pdf]

### Supplementary Information

Experimental and theoretical investigations of the effect of heteroatom doped Carbon microsphere support on stability and storage capacity of nano- $\text{Co}_3\text{O}_4$  conversion anode for Lithium-ion batteries

Pravin K. Dwivedi<sup>ab</sup>, Aathira Nair<sup>a</sup>, Rupali S. Mehare<sup>ab</sup>, Vikash Chaturvedi<sup>ab</sup>, Kavita Joshi<sup>ab\*</sup> and Manjusha V. Shelke<sup>ab\*</sup>

<sup>a</sup> Physical and Materials Chemistry Division, CSIR-National Chemical Laboratory, Pune 411008, MH, India.

<sup>b</sup> Academy of Scientific and Innovative Research (AcSIR), Gaziabad 201002, UP, India.

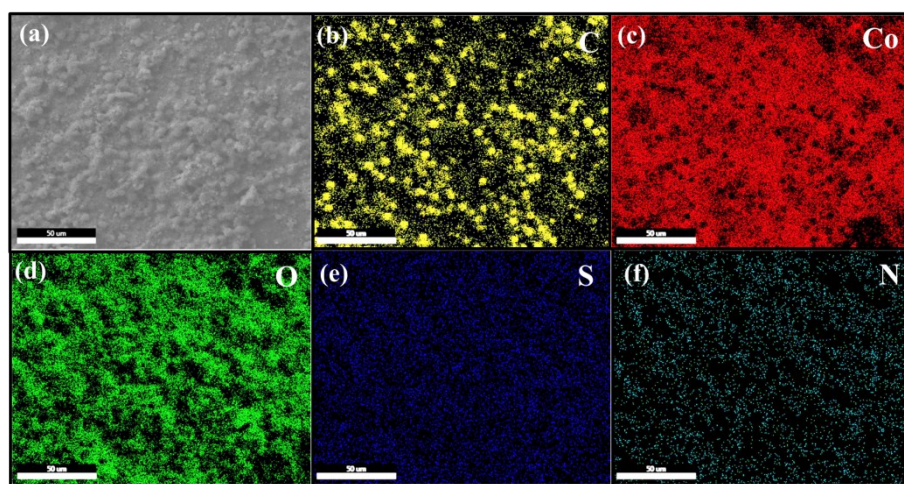

**Figure S1.** (a) ESEM elemental mapping images of (b) C, (c) Co, (d) O, (e) S and (f) N.

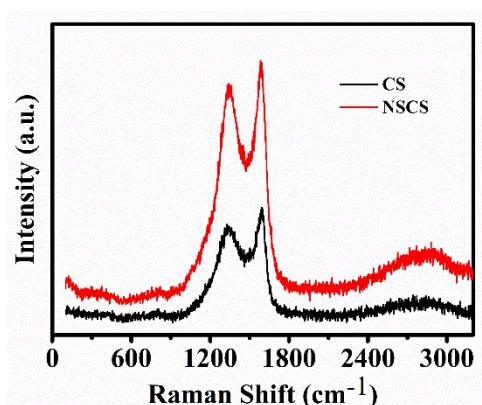

**Figure S2.** (a) The Raman spectra of CS and NSCS.

Raman spectrum was carried out to further investigate the graphitic and disordered nature of the Carbon sphere and N and S Doped carbon sphere (Figure S2). The Raman spectra of CS and NSCS contain peaks centered near  $1350\text{ cm}^{-1}$  and  $1592\text{ cm}^{-1}$ , which are the D and G bands respectively, as shown in figure S2. The D band arises from the vibrations of carbon atoms with dangling bonds in plane terminations, and is thus related to the defects of graphitic carbon, whereas the G band arises from the vibrations of  $\text{sp}^2$  carbon atoms in the graphitic layer. The ratio of the integrated areas of the D and G bands ( $\text{ID/IG}$ ) of CS and NSCS were estimated using Gaussian curve fit and found 2.6 and 2.8, respectively. [1, 2]

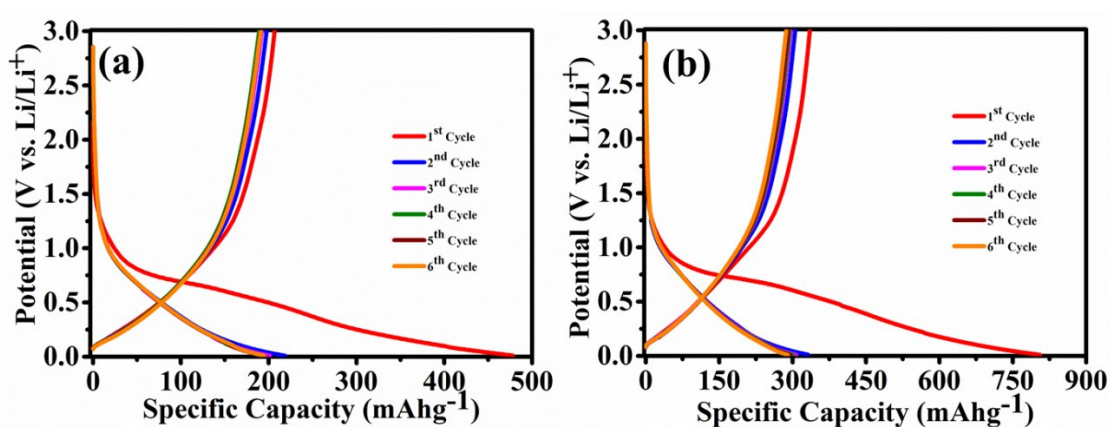

**Figure S3:** Galvanostatic charge-discharge profiles of (a) CS (b) NSCS electrode at current density of  $100\text{ mA g}^{-1}$ .

The galvanostatic charge-discharge profiles of the CS and NSCS for first six cycles at a current density of  $100\text{ mA g}^{-1}$  between 0.01-3 V are presented in the figure S3a and S3b. Specific discharge capacities for CS and NSCS are found to be around  $251$  and  $317\text{ mAh g}^{-1}$  respectively at second cycle. Higher specific discharge capacity of NSCS is due to the hetero atoms (N and S) in the carbon matrix. The large initial capacity loss in both the samples can be attributed to the irreversible storage of Li-ions in to the carbon matrix and electrolyte decomposition resulting in to the formation of SEI film.

Figure S4a shows the Nyquist plots for NSCS- $\text{Co}_3\text{O}_4$  electrode in a fresh cell and after  $10^{\text{th}}$ ,  $30^{\text{th}}$ ,  $60^{\text{th}}$ ,  $250^{\text{th}}$  cycles of charge-discharge at  $1\text{ Ag}^{-1}$  of current density. It can be seen in the impedance spectrum that the charge transfer resistance of the cell decreases after  $10^{\text{th}}$  cycle, whereas charge transfer resistance and Warburg impedance both increased after  $30^{\text{th}}$  and  $60^{\text{th}}$  cycles. This could be probably due to structural changes occurring in the electrode material for a few cycles after the activation process. The impedance spectrum taken after 250 cycles shows two prominent semicircles, one at the higher frequency range corresponding to the SEI layer resistance and the one at mid frequency corresponding to charge transfer resistance. It is observed that after 250 cycles, both the Warburg as well as charge transfer resistance of the cell decreased on account of SEI layer formation with

optimum thickness on the electrode surface and enhanced electronic/ionic transport due to electrolyte penetration leading to the increased specific capacity of the electrode. [3, 4] Thus, the impedance measurement of the cell at different levels of cycling validates the cycle life study.

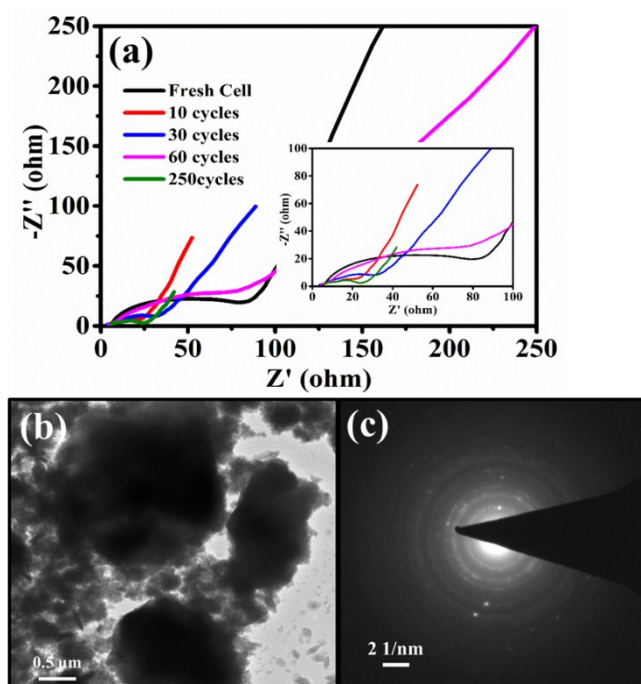

**Figure S4:** (a) Impedance spectra of NSCS-Co<sub>3</sub>O<sub>4</sub> nanocomposite at different cycle number during cycling at 1 Ag<sup>-1</sup> (b) TEM images and (c) SAED pattern of NSCS-Co<sub>3</sub>O<sub>4</sub> nanocomposite electrode after 350 cycles at 1 Ag<sup>-1</sup>.

Furthermore, figure S4b represents the TEM images of the NSCS-Co<sub>3</sub>O<sub>4</sub> electrode cycled at 1 Ag<sup>-1</sup> over 350 cycles. It can be seen that the morphology of the NSCS-Co<sub>3</sub>O<sub>4</sub> nanocomposites is still retained after a large number of charge-discharge cycles. A SAED pattern of the same electrode after the 350 cycles is presented in figure S4c; from the observations, it appears that the electrode material has partially retained its polycrystalline nature after 350 charge-discharge cycles.

**Table S1.** Comparative study of electrochemical performance of Co<sub>3</sub>O<sub>4</sub>/Carbon composites as an anode for Li - ion battery.

| Electrode Material                                      | Cycling stability                                              | Specific capacity (mAhg <sup>-1</sup> ) | Reference |
|---------------------------------------------------------|----------------------------------------------------------------|-----------------------------------------|-----------|
| Co <sub>3</sub> O <sub>4</sub> /nitrogen doped graphene | 1328 mAhg <sup>-1</sup> at 0.1 A g <sup>-1</sup> , 200 cycle   | 700 (1 Ag <sup>-1</sup> )               | 5         |
| Sandwich-like Co <sub>3</sub> O <sub>4</sub> /Graphene  | 1113 mAhg <sup>-1</sup> , at 0.2 A g <sup>-1</sup> , 100 cycle | 899.8 (1 Ag <sup>-1</sup> )             | 6         |

|                                                                      |                                                                |                                                     |                  |
|----------------------------------------------------------------------|----------------------------------------------------------------|-----------------------------------------------------|------------------|
| Graphene/Co <sub>3</sub> O <sub>4</sub> nanotubes                    | 961.4 mAhg <sup>-1</sup> , at 0.1 A g <sup>-1</sup> , 80 cycle | ~600 (0.8 Ag <sup>-1</sup> )                        | 7                |
| 6Plasma-treated Co <sub>3</sub> O <sub>4</sub> /graphene             | 1269 mAhg <sup>-1</sup> , at 0.125 Ag <sup>-1</sup> , 50 cycle | 400 (0.95 Ag <sup>-1</sup> )                        | 8                |
| Co <sub>3</sub> O <sub>4</sub> /CC@Graphene                          | 391 mAhg <sup>-1</sup> , at 0.1 Ag <sup>-1</sup> , 300 cycle   | 473 (0.1 Ag <sup>-1</sup> )                         | 9                |
| Co <sub>3</sub> O <sub>4</sub> -graphene sheet-on-sheet              | 1065 mAhg <sup>-1</sup> , at 0.1 Ag <sup>-1</sup> , 30 cycle   | 1235 (0.1 C)                                        | 10               |
| Co <sub>3</sub> O <sub>4</sub> /Graphene                             | 1095 mAhg <sup>-1</sup> , at 0.2 Ag <sup>-1</sup> , 100 cycle  | 1480 (0.1 Ag <sup>-1</sup> )                        | 11               |
| Co <sub>3</sub> O <sub>4</sub> /porous carbon nanofibers             | 825.6 mAhg <sup>-1</sup> at 0.1 C, 50 cycles                   | 869.5 mAhg <sup>-1</sup> (0.1 C)                    | 12               |
| Carbon-Encapsulated Co <sub>3</sub> O <sub>4</sub> Nanoparticles     | 760 mAhg <sup>-1</sup> at 5 C, 1000 cycles                     | 1413 mA h g <sup>-1</sup> (0.1Ag <sup>-1</sup> )    | 13               |
| Three-dimensional (3D) mesoporous Co <sub>3</sub> O <sub>4</sub> /CA | 779 mAhg <sup>-1</sup> at 50 mAg <sup>-1</sup> , 50 cycles     | 987 mAhg <sup>-1</sup> (50 mAg <sup>-1</sup> )      | 14               |
| Co <sub>3</sub> O <sub>4</sub> /MWCNT hybrid nanostructures          | 940 mAg <sup>-1</sup> at 0.2 C, 70 cycles                      | 750 mAhg <sup>-1</sup> (0.2 C)                      | 15               |
| <b>Co3O4-NSCS</b>                                                    | <b>1285 mAhg<sup>-1</sup> at 1 Ag<sup>-1</sup>, 350 cycles</b> | <b>1807 mAhg<sup>-1</sup> (0.1 Ag<sup>-1</sup>)</b> | <b>This work</b> |

## References:

1. K. Sun, Y. Hu, X. Zhang, K. San Hui, K. Zhang, G. Xu, J. Ma and W. He, *Electrochim. Acta*, 2020, **335**, 135680.
2. S. C. Ray, Z. N. Tetana, R. Erasmus, W.-F. Pong and N. J. Coville, *Appl. Phys. A*, 2014, **115**, 153-157.
3. Y. Bai, X. Wang, X. Zhang, H. Shu, X. Yang, B. Hu, Q. Wei, H. Wu and Y. Song, *Electrochim. Acta*, 2013, **109**, 355-364.
4. T. Liu, A. Garsuch, F. Chesneau and B. L. Lucht, *J. Power Sources*, 2014, **269**, 920-926.
5. X. Xing, R. Liu, S. Liu, S. Xiao, Y. Xu, C. Wang and D. Wu, *Electrochim. Acta*, 2016, **194**, 310-316.
6. Y. Yang, J. Huang, J. Zeng, J. Xiong and J. Zhao, *ACS Appl. Mater. Interfaces*, 2017, **9**, 32801-32811.
7. D. Li, Q. Lu, E. Guo, M. Wei, Z. Xiu and X. Ji, *J. Sol-Gel Sci. Technol.*, 2017, **82**, 75-84.
8. H. Long, M. Zhang, Q. Wang, L. Xing, S. Wang and X. Xue, *J. Alloys Compd.*, 2017, **701**, 200-207.
9. Q. Xie, Y. Zhang, Y. Zhu, W. Fu, X. Zhang, P. Zhao and S. Wu, *Electrochim. Acta*, 2017, **247**, 125-131.

10. Q. Su, W. Yuan, L. Yao, Y. Wu, J. Zhang and G. Du, *Mater. Res. Bull.*, 2015, **72**, 43-49.
11. S. Wang, R. Wang, J. Chang, N. Hu and C. Xu, *Sci. Rep.*, 2018, **8**, 3182.
12. H. Yang, Y. Wang, Y. Nie, S. Sun and T. Yang, *J. Compos. Mater.*, 2016, **51**, 315-322.
13. X. Leng, S. Wei, Z. Jiang, J. Lian, G. Wang and Q. Jiang, *Sci. Rep.*, 2015, **5**, 16629.
14. F. Hao, Z. Zhang and L. Yin, *ACS Appl. Mater. Interfaces*, 2013, **5**, 8337-8344.
15. Z. Fang, W. Xu, T. Huang, M. Li, W. Wang, Y. Liu, C. Mao, F. Meng, M. Wang, M. Cheng, A. Yu and X. Guo, *Mater. Res. Bull.*, 2013, **48**, 4419-4423.
